# Supplementary material
Source: HighWire-hosted journal article supplement (https://qualitysafety.bmj.com/content/30/7/599)
Supplement: inline-supplementary-material-1 [file inline-supplementary-material-1.pdf]

**Supplement:****Supplemental Table 1: Triage Decision Support Tool: New Patients Referred for OSA Evaluation**

| <b><u>Patient Factors</u></b>                                                                                                                                                                                                                                 | <b><u>Recommendation</u></b>                  |
|---------------------------------------------------------------------------------------------------------------------------------------------------------------------------------------------------------------------------------------------------------------|-----------------------------------------------|
| <b>Relevant Medical Conditions:</b>                                                                                                                                                                                                                           |                                               |
| o Chronic heart diseases: any heart failure symptoms documented and/or EF<45%; complex cardiac history (myocardial infarction/coronary artery bypass graft/pacemaker) without documentation of EF; atrial fibrillation (limits accuracy of WatchPAT device) ‡ | PSG (avoid ASV if heart failure with EF <45%) |
| o Chronic lung diseases: chronic obstructive pulmonary disease, pulmonary hypertension, interstitial disease ‡                                                                                                                                                | PSG (consider with CO2 monitoring)            |
| o Neurologic diseases: recent stroke, conditions of neuromuscular weakness like amyotrophic lateral sclerosis (ALS) and Duchenne Muscular Dystrophy ‡                                                                                                         | PSG (consider with CO2 monitoring)            |
| o BMI >45 ‡                                                                                                                                                                                                                                                   | PSG                                           |
| o Severe insomnia (recorded awake breathing reduces HSAT accuracy) ‡                                                                                                                                                                                          | PSG                                           |
| <b>Relevant Medications:</b>                                                                                                                                                                                                                                  |                                               |
| o alpha-blockers (e.g. clonidine, carvedilol, prazosin, terazosin, alfuzosin, tamsulosin, doxazosin, labetalol, tizanidine)                                                                                                                                   | PSG (no WatchPAT, other HSAT ok*)             |
| o phosphodiesterase inhibitors taken on nightly basis (e.g. sildenafil, tadalafil)                                                                                                                                                                            | PSG (no WatchPAT, other HSAT ok*)             |
| o long acting or scheduled opioid use ‡                                                                                                                                                                                                                       | PSG                                           |
| o long acting nitrates (e.g. isosorbide mononitrate, isosorbide dinitrate, nitro patch)                                                                                                                                                                       | PSG (no WatchPat, other HSAT ok*)             |
| <b>If no to all items above, assess pre-test probability of disease:</b>                                                                                                                                                                                      |                                               |
| o High pretest probability = <b>snoring, witnessed apneas</b> , fatigue, daytime somnolence, BMI>30. Must have at least snoring or witnessed apnea to be considered high pre-test probability                                                                 | WatchPAT                                      |
| o Low pretest probability = does not have above, specifically snoring and/or witnessed apnea                                                                                                                                                                  | PSG                                           |

\*- Other HSAT devices were not in use at our institution during the time period in question

‡-Specialist review and co-signature encouraged

**Supplemental Table 2:** Definitions used to define potentially contraindicated and potentially inappropriate sleep testing based on center criteria.

| <b>Contraindications:</b>                                                                        | <b>Definition/Source for Analysis</b>                                                                                                                                                    |
|--------------------------------------------------------------------------------------------------|------------------------------------------------------------------------------------------------------------------------------------------------------------------------------------------|
| <b>General HSAT Contraindications</b>                                                            |                                                                                                                                                                                          |
| Congestive Heart Failure                                                                         | Charlson comorbidity index <sup>1</sup>                                                                                                                                                  |
| Cerebrovascular Disease                                                                          | Charlson comorbidity index <sup>1</sup>                                                                                                                                                  |
| Chronic lung disease                                                                             | Charlson comorbidity index <sup>1</sup>                                                                                                                                                  |
| Disorders of Sleep Related Hypoventilation                                                       | ICD-10: E66.2, G12.21, G47.34, G47.36                                                                                                                                                    |
| Body Mass Index $\geq 45$ kg/m <sup>2</sup> (elevated risk for obesity hypoventilation syndrome) | Vital Signs                                                                                                                                                                              |
| Long Acting Opioid Agent                                                                         | Pharmacy Records (e.g. current prescription of morphine sulfate sustained action, oxycodone extended release, fentanyl patch)                                                            |
| <b>WatchPAT Contraindications (only HSAT used in this time period)</b>                           |                                                                                                                                                                                          |
| Nitrate Medications                                                                              | Pharmacy Records (e.g. current prescription of isosorbide mononitrate, nitroglycerin)                                                                                                    |
| Alpha Blocker Medications                                                                        | Pharmacy Records (e.g. current prescription of prazosin, doxazosin, terazosin)                                                                                                           |
| Phosphodiesterase Inhibitors                                                                     | Pharmacy Records (e.g. current prescription of sildenafil, tadalafil)                                                                                                                    |
| Atrial Fibrillation                                                                              | Atrial Fibrillation (ICD-10 I48.0, I48.1, I48.2, I48.3, I48.4, I48.91, I48.92)                                                                                                           |
| <b>Symptoms*</b>                                                                                 |                                                                                                                                                                                          |
| Snoring                                                                                          | Chart review of referral*                                                                                                                                                                |
| Witnessed apneas                                                                                 | Chart review of referral*                                                                                                                                                                |
| <b>Final Definitions</b>                                                                         |                                                                                                                                                                                          |
| Potentially Contraindicated test                                                                 | 1) HSAT ordered or performed if one or more HSAT or WatchPAT contraindications are present                                                                                               |
| Potentially Inappropriate test                                                                   | 1) HSAT ordered or performed if one or more HSAT or WatchPAT contraindications are present <b>OR</b><br>2) HSAT ordered or performed if patient has neither of symptoms above documented |

Legend: HSAT-Home Sleep Apnea Test, ICD-10 - International Statistical Classification of Diseases and Related Health Problems, tenth edition, PAT- Peripheral Arterial Tonometry. \*-Chart reviews for symptom assessment only available in propensity matched sample of nurses with independent decision-making and matched traditional triages.

1. Deyo RA, Cherkin DC, Ciol MA. Adapting a clinical comorbidity index for use with ICD-9-CM administrative databases. *J Clin Epidemiol.* 1992;45(6):613–619.

**Supplemental Table 3: Baseline characteristics of propensity matched sub-sample.**

|                                   | <b>TSS Triage</b><br>n=306 | <b>RCS Triage</b><br>n=306 |          |
|-----------------------------------|----------------------------|----------------------------|----------|
|                                   | Mean (SD)/ N (%)           |                            | Std Diff |
| Age (years)                       | 46.3 (14.7)                | 46.8 (13.7)                | 0.03     |
| Male (%)                          | 263 (85.9)                 | 266 (86.9)                 | 0.03     |
| White (%)                         | 195 (63.7)                 | 196 (64.1)                 | 0.01     |
| Hispanic (%)                      | 26 (8.5)                   | 32 (10.5)                  | 0.07     |
| BMI Category (%)                  |                            |                            | 0.08     |
| <30 kg/m <sup>2</sup>             | 104 (34.0)                 | 97 (31.7)                  |          |
| 30-34.9 kg/m <sup>2</sup>         | 66 (21.6)                  | 76 (24.8)                  |          |
| 35-39.9 kg/m <sup>2</sup>         | 54 (17.6)                  | 51 (16.7)                  |          |
| >=40 kg/m <sup>2</sup>            | 19 (6.2)                   | 20 (6.5)                   |          |
| Missing BMI                       | 63 (20.6)                  | 62 (20.3)                  |          |
| BMI (kg/m <sup>2</sup> )*         | 32.0 (5.9)                 | 32.0 (5.3)                 | 0.01     |
| Hypertension (%)                  | 70 (22.9)                  | 78 (25.5)                  | 0.06     |
| Myocardial Infarction (%)         | 2 (0.7)                    | 2 (0.7)                    | 0.00     |
| Congestive Heart Failure (%)      | 2 (0.7)                    | 2 (0.7)                    | 0.00     |
| Atrial Fibrillation (%)**         | 0 (0.0)                    | 0 (0.0)                    | 0.00     |
| Stroke (%)                        | 4 (1.3)                    | 4 (1.3)                    | 0.00     |
| Chronic Lung Disease (%)          | 18 (5.9)                   | 14 (4.6)                   | 0.06     |
| Sleep Disturbance Unspecified (%) | 10 (3.3)                   | 13 (4.2)                   | 0.05     |
| Restless Leg Syndrome (%)         | 2 (0.7)                    | 2 (0.7)                    | 0.00     |
| Insomnia (%)                      | 53 (17.3)                  | 48 (15.7)                  | 0.04     |
| Opioid Prescription (%)           | 12 (3.9)                   | 10 (3.3)                   | 0.04     |
| Alpha Blocker Prescription (%)    | 10 (3.3)                   | 7 (2.3)                    | 0.06     |
| PDE-5 Inhibitor (%)**             | 0 (0.0)                    | 0 (0.0)                    | 0.00     |
| Charlson Score (points)           | 1.0 (1.4)                  | 1.0 (1.5)                  | 0.02     |
| Drive Time (minutes)*             | 56.5 (35.3)                | 59.0 (29.2)                | 0.08     |

**Legend:** TSS-Traditional Specialist-Led System, RCS-Referral Coordination System, Std Diff-Standardized difference; BMI-Body Mass Index. \*-Drive time and Continuous measure of BMI not used in propensity score model due to missingness, included here for purposes of description. \*\*-Atrial fibrillation and PDE-5 inhibitors not used in propensity score due to collinearity, included here for purposes of description.

**Supplemental Figure 1:**

Histogram of propensity scores in matched groups.

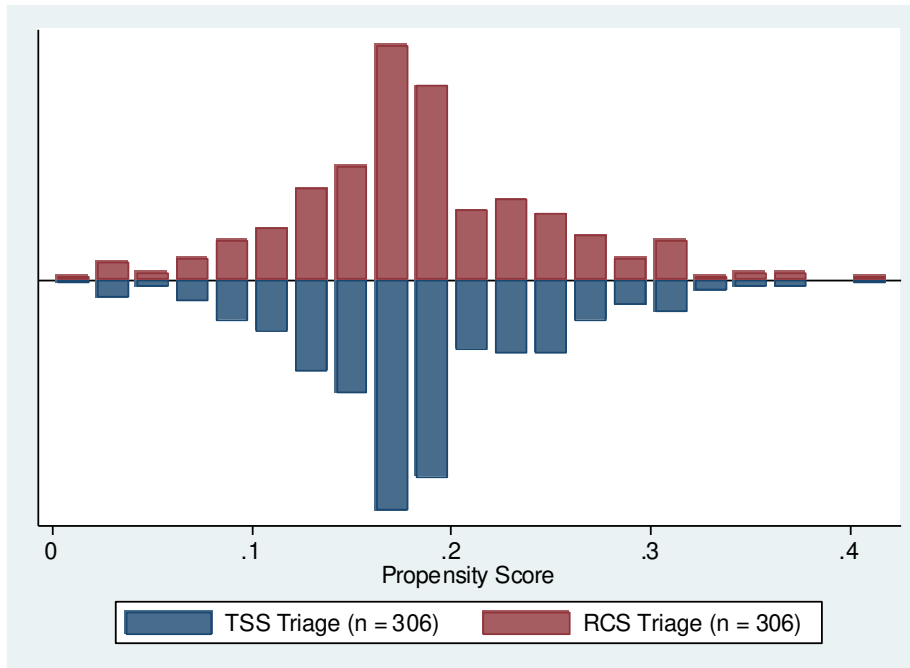

Legend: TSS-Traditional Specialist-Led System, RCS-Referral Coordination System.

**Supplemental Figure 2:** Diagnostic outcome by group in the propensity-matched sub-sample.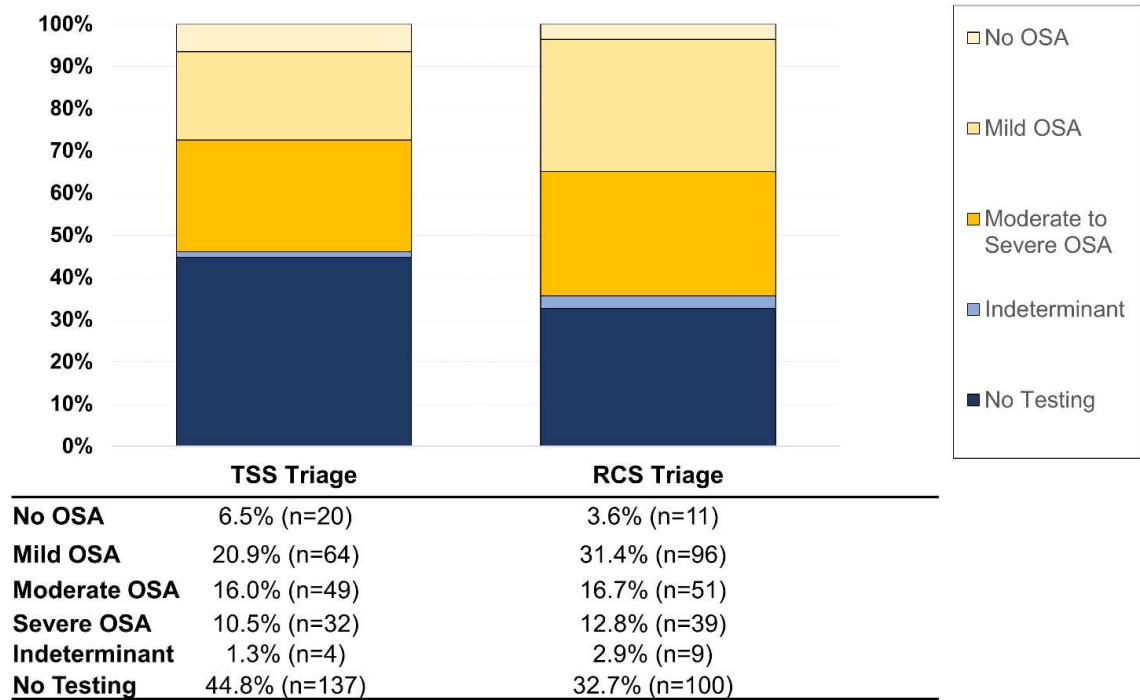

Legend: TSS-Traditional Specialist-Led System, RCS-Referral Coordination System, OSA: Obstructive sleep apnea. Indeterminant refers to a home sleep apnea test that did not meet criteria for OSA without confirmatory testing in-laboratory.
